# Supplementary material for: Para una politica de desarrollo de las ciencias sociales en colombia
Source: Royal Society of Chemistry journal article supplement (doi:10.1039/d4dt00932k), 1985-01-01
Supplement: d4dt00932k1.pdf [file d4dt00932k1.pdf]

**Supporting Information**  
**for**

**Effect of Distal Metal Species on Lewis Basicity of a  $\mu_3$ -Oxo Ligand  
in Doubly Oxo-bridged  $(\mu_3\text{-O})[\text{Rh}(\text{cod})]_3(\mu_4\text{-O})\text{M}$  Core**

Hayato Tsurugi,<sup>a,b\*</sup> Hiroki Mori,<sup>a</sup> Haruna Mori,<sup>a</sup> Masami Nakamoto,<sup>a</sup>  
Shinji Tanaka,<sup>c</sup> and Kazushi Mashima<sup>d</sup>

<sup>a</sup> Department of Chemistry, Graduate School of Engineering Science,  
Osaka University, Toyonaka, Osaka 560-8531, Japan

<sup>b</sup> Innovative Catalysis Science Division, Institute for Open and Transdisciplinary  
Research Initiatives (ICS-OTRI), Osaka University, Suita, Osaka 565-0871, Japan

<sup>c</sup> Interdisciplinary Research Center for Catalytic Chemistry (IRC3), National Institute of  
Advanced Industrial Science and Technology (AIST), Tsukuba, Ibaraki 305-8565, Japan

<sup>d</sup> Graduate School of Pharmaceutical Sciences, Osaka University,  
Suita, Osaka 565-0871, Japan

E-mail: [tsurugi@chem.es.osaka-u.ac.jp](mailto:tsurugi@chem.es.osaka-u.ac.jp)

**Contents:**

- 1. General procedure**
- 2. Synthesis of multi-metallic complexes**
- 3. NMR spectra of a mixture of 1 and  $\text{LiBF}_4$**
- 4. X-ray crystallographic analysis**
- 5. DFT calculation**
- 6. Cartesian Coordinates of Optimized Structures**
- 7. References**

## 1. General procedure

**General.** All manipulations involving air- and moisture-sensitive compounds were carried out under an argon atmosphere by using standard vacuum line and Schlenk tube techniques or Ar-filled glovebox. C<sub>6</sub>D<sub>6</sub>, and THF-*d*<sub>8</sub> were distilled under an argon atmosphere over CaH<sub>2</sub>. Toluene, THF, and hexane were dried and deoxygenated by using Grubbs column (Glass Counter Solvent Dispensing System, Nikko Hansen & Co, Ltd.). [Rh(OH)(cod)]<sub>2</sub>, and AuCl(PPh<sub>3</sub>) were synthesized according to the literature procedure.<sup>[1]</sup> All other reagents were purchased at the highest commercial quality and used without further purification. <sup>1</sup>H NMR (400 MHz), <sup>13</sup>C{<sup>1</sup>H} NMR (100 MHz), and <sup>31</sup>P{<sup>1</sup>H} NMR (162 MHz) spectra were measured on a Bruker Advance III-400 spectrometer in 5 mm NMR tubes. All <sup>1</sup>H NMR chemical shifts were reported in ppm relative to the residual solvent protons in C<sub>6</sub>D<sub>6</sub> at δ 7.16 and THF-*d*<sub>8</sub> at δ 1.76. All <sup>13</sup>C{<sup>1</sup>H} NMR chemical shifts were reported in ppm relative to carbon resonance of the solvent itself in C<sub>6</sub>D<sub>6</sub> at δ 128.06 and THF-*d*<sub>8</sub> at δ 25.31. All melting points were recorded on BUCHI melting point M-565. Elemental analyses were recorded by using Perkin-Elmer 2400 at the Faculty of Engineering Science, Osaka University.

**Computational Details.** Geometry optimizations were performed using Gaussian16 program revision C.01,<sup>[2]</sup> without any symmetry constraints. Calculations were running using the unrestricted B3LYP functional,<sup>[3]</sup> corrected for dispersion a proposed by Grimme (D3 correction with Becke-Johnson damping),<sup>[4]</sup> at the 6-31+G(d) basis set<sup>[5]</sup> for C, H, O, P, N, and Li, and SDD<sup>[6]</sup> for Rh and Au with a frequency calculation, and the SMD solvation model (THF)<sup>[7]</sup> is used for complexes **1-3** and (μ<sub>3</sub>-O){Rh(cod)}<sub>3</sub>(μ<sub>4</sub>-O)Li(THF)<sub>3</sub>. Thermodynamic corrections were calculated with frequency analysis to be either minima (with no imaginary frequencies) or transition states (with one imaginary frequency) at 298.15 K. The electronic energies, free energies, and cartesian coordinates are listed in the following section.

**X-ray Diffraction Study.** All crystals were mounted on the CryoLoop (Hampton Research Corp.) with a layer of light mineral oil and placed in a nitrogen stream at 113(1) K. Measurements were made on a Rigaku XtaLAB P200 diffractometer using multi-layer mirror monochromated Mo-Kα (0.71075 Å) radiation. Crystal data and structure refinement parameters were listed in Table S1. The structure was solved by SHELXT Version 2014/5<sup>[8]</sup> and refined on *F*<sup>2</sup> by full matrix least-squares method using SHELXL-2016/4<sup>[9]</sup> in the CrystalStructure 4.2.4 program.<sup>[10]</sup> Non-hydrogen atoms were anisotropically refined. H-atoms were included in the refinement on calculated positions riding on their carrier atoms. The function minimized was  $[\sum w(F_o^2 - F_c^2)^2]$  ( $w = 1 / [\sigma^2(F_o^2) + (aP)^2 + bP]$ ), where  $P = (\text{Max}(F_o^2, 0) + 2F_c^2) / 3$  with  $\sigma^2(F_o^2)$  from counting

statistics. The function  $R1$  and  $wR2$  were  $(\sum||F_o| - |F_c||) / \sum|F_o|$  and  $[\sum w(F_o^2 - F_c^2)^2 / \sum(wF_o^4)]^{1/2}$ , respectively. The Mercury 2020.3.0 program was used to draw the molecule.<sup>[11]</sup>

## 2. Synthesis of multi-metallic complexes

### Synthesis of Rh<sub>3</sub>Au complex 1.

To a solution of Au[N(SiMe<sub>3</sub>)<sub>2</sub>](PPh<sub>3</sub>) (2.10 g, 3.39 mmol) in THF (25 mL) was added a suspension of [Rh(OH)(cod)]<sub>2</sub> (1.54 g, 3.38 mmol) in THF (25 mL). After stirring at room temperature for 2 h under dark, the reaction mixture was concentrated to ca. 15 mL. Hexane (55 mL) was added and yellow powder was precipitated. The supernatant was removed and the yellow solid was washed with hexane (50 mL x 3). All volatiles were removed under reduced pressure to give yellow solid of **1** in 97% yield (2.46 g, 2.19 mmol). Mp. 153-160 °C (dec.). <sup>1</sup>H NMR (400 MHz, THF-*d*<sub>8</sub>, 303 K)  $\delta$  7.48 (overlapping m, 9H, Ar), 7.33 (m, 6H, Ar), 3.71 (br s, 12H, =CH of cod), 2.57 (m, 12H, CH<sub>2</sub> of cod), 1.91 (m, 12H, CH<sub>2</sub> of cod). <sup>1</sup>H NMR (400 MHz, C<sub>6</sub>D<sub>6</sub>, 303 K)  $\delta$  7.23 (m, 6H, Ar), 6.87 (overlapping m, 9H, Ar), 34.26 (br s, 12H, =CH of cod), 2.79 (m, 12H, CH<sub>2</sub> of cod), 2.07 (m, 12H, CH<sub>2</sub> of cod). <sup>13</sup>C {<sup>1</sup>H} NMR (100 MHz, THF-*d*<sub>8</sub>, 303 K)  $\delta$  134.6 (d,  $J_{PC}$  = 13.4 Hz, Ar), 132.4. (Ar), 129.8 (d,  $J_{PC}$  = 11.7 Hz, Ar), 72.1 (d,  $J_{RhC}$  = 14.7 Hz, cod), 32.5(s, cod). <sup>13</sup>C {<sup>1</sup>H} NMR (100 MHz, C<sub>6</sub>D<sub>6</sub>, 303 K)  $\delta$  134.1 (d,  $J_{PC}$  = 14.2 Hz, Ar), 131.8. (br s, Ar), 130.0 (s, Ar), 129.2 (s, Ar) 72.3 (d,  $J_{RhC}$  = 13.3 Hz, cod), 32.5(s, cod). <sup>31</sup>P {<sup>1</sup>H} NMR (162 MHz, THF-*d*<sub>8</sub>, 303 K)  $\delta$  22.6 (s). <sup>31</sup>P {<sup>1</sup>H} NMR (162 MHz, C<sub>6</sub>D<sub>6</sub>, 303 K)  $\delta$  22.6 (s). Anal. calcd. for C<sub>42</sub>H<sub>51</sub>O<sub>2</sub>PAuRh<sub>3</sub>(OC<sub>4</sub>H<sub>8</sub>): C, 46.17; H, 4.97. Found: C, 46.19 H, 4.80 N, 0.05.

### Synthesis of Rh<sub>3</sub>Au<sub>2</sub> complex 2.

To a solution of AuCl(PPh<sub>3</sub>) (220.0 mg, 0.444 mmol) in THF (9 mL) was added a solution of AgBF<sub>4</sub> (86.6 mg, 0.444 mmol) in THF (2 mL). White precipitate was removed by filtration through glass filter, and the filtrate containing [Au(PPh<sub>3</sub>)] [BF<sub>4</sub>] was added to a suspension of **1** (500 mg, 0.444 mmol) in THF (2 mL). The reaction mixture was stirred at room temperature for 1 h under dark, and then resulting yellow suspension was centrifuged to give yellow solid. The yellow solid was washed with THF (1 mL) and hexane (2 mL x 3), and dried under reduced pressure to give yellow powder of **2** in 84% yield (619 mg, 0.371 mmol). Mp. 126-133 °C (dec.). <sup>1</sup>H NMR (400 MHz, THF-*d*<sub>8</sub>, 303 K)  $\delta$  7.60 (m, 6H, Ar), 7.53 (m, 12H, Ar), 7.34 (m, 12H, Ar), 4.18 (br, 12H, =CH of cod), 2.75 (m, 12H, CH<sub>2</sub> of cod), 2.06 (m, 12H, CH<sub>2</sub> of cod). <sup>13</sup>C {<sup>1</sup>H} NMR (400 MHz, THF-*d*<sub>8</sub>, 303 K)  $\delta$  134.5 (d,  $J_{PC}$  = 13.5 Hz, Ar), 131.2 (d,  $J_{PC}$  = 357.2 Hz, Ar), 130.1 (d,  $J_{PC}$  = 12.9 Hz, Ar), 129.0 (d,  $J_{PC}$  = 73.7 Hz, Ar), 75.6 (d,  $J_{RhC}$  = 14.0 Hz, cod), 32.1 (s, cod).

$^{31}\text{P}\{^1\text{H}\}$  NMR (162 MHz, THF- $d_8$ , 303 K)  $\delta$  23.1 (s). Anal. calcd. for  $\text{C}_{60}\text{H}_{66}\text{O}_2\text{P}_2\text{BF}_4\text{Au}_2\text{Rh}_3$ : C, 43.14; H, 3.98. Found: C, 42.83 H, 3.83 N, 0.05.

### Elimination of $\text{AuCl}(\text{PPh}_3)$ from a mixture of **2** and $\text{Et}_4\text{NCl}$ .

To a brown THF suspension (5 mL) of  $\text{Rh}_3\text{Au}_2$  (99.9 mg, 59.8  $\mu\text{mol}$ ) was added a THF suspension (15 mL) of  $\text{Et}_4\text{NCl}$  (29.7 mg, 179.5  $\mu\text{mol}$ , 3.0 equiv.), giving a yellow-brown suspension. Excess amounts of  $\text{Et}_4\text{NCl}$  were necessary for the quantitative conversion. After stirring for 2 hours, the yellow suspension was centrifuged. The yellow supernatant was concentrated to ca. 5 mL, resulted in a yellow suspension. Further addition of acetonitrile (12 mL) afforded yellow precipitates, and the precipitates were washed with hexane (5 mL x 2) and dried to give  $\text{Rh}_3\text{Au}$  complex **1** in 62% yield (41.6 mg) as a yellow powder. The  $^1\text{H}$  NMR data was superimposed to the above-isolated sample.

### Elimination of $\text{Au}[\text{N}(\text{SiMe}_3)_2](\text{PPh}_3)$ from a mixture of **1** and $\text{Li}[\text{N}(\text{SiMe}_3)_2]$ .

To a yellow powder of  $\text{Rh}_3\text{Au}$  complex **1** (10.0 mg, 8.89  $\mu\text{mol}$ ) was added a solution of  $\text{LiN}(\text{SiMe}_3)_2$  (1.5 mg, 8.96  $\mu\text{mol}$ , 1.0 equiv.) in THF- $d_8$  (0.5 mL) to form a yellow suspension.  $^{31}\text{P}\{^1\text{H}\}$  NMR measurements showed a peak at 33.2 ppm assignable to  $\text{Au}[\text{N}(\text{SiMe}_3)_2](\text{PPh}_3)$ .

### 3. NMR spectra of a mixture of **1** and $\text{LiBF}_4$

Upon addition of  $\text{LiBF}_4$  to **1** in THF- $d_8$ , resonances for the COD ligands of **1** shifted to the lower magnetic field due to the interaction of  $\text{Li}^+$  to the  $\mu_3$ -oxo ligand of **1** to form Li-interacted species **3**. Gradual downfield shift of the COD ligands by increasing the amount of  $\text{LiBF}_4$  is reasonable to the equilibrium between **1** and **3**. In this reaction, **2** was also formed after dissociation of  $[\text{Au}(\text{PPh}_3)][\text{BF}_4]$  from **3** and subsequent complexation with remaining **1** (Scheme S1).

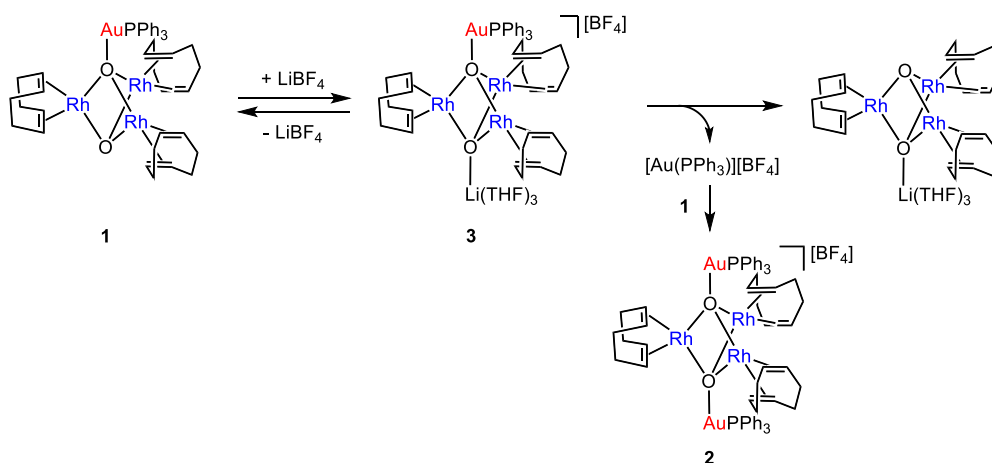

**Scheme S1.** Overall Description for the Reactivity of **1** with  $\text{LiBF}_4$

Experimental details: To a yellow powder of **1** (10.0 mg, 8.89  $\mu\text{mol}$ ) was added a THF- $d_8$  suspension of  $\text{LiBF}_4$  (1 equiv. = 0.8 mg, 8.5  $\mu\text{mol}$ ; 2 equiv. = 1.7 mg, 18.1  $\mu\text{mol}$ ; 5 equiv. = 4.1 mg, 44  $\mu\text{mol}$ ; 10 equiv. = 8.3 mg, 89  $\mu\text{mol}$ ). The addition of 1-5 equiv. of  $\text{LiBF}_4$  resulted in suspension with a large amount of undissolved yellow powder of **1**, while the addition of 10 equiv. of  $\text{LiBF}_4$  resulted in disappearance of **1**.  $^{31}\text{P}\{^1\text{H}\}$  and  $^1\text{H}$  NMR spectra were measured after 1 hour, showing signals for the COD ligand shifted to lower magnetic fields with increasing the amount of  $\text{LiBF}_4$  (Figure S1).

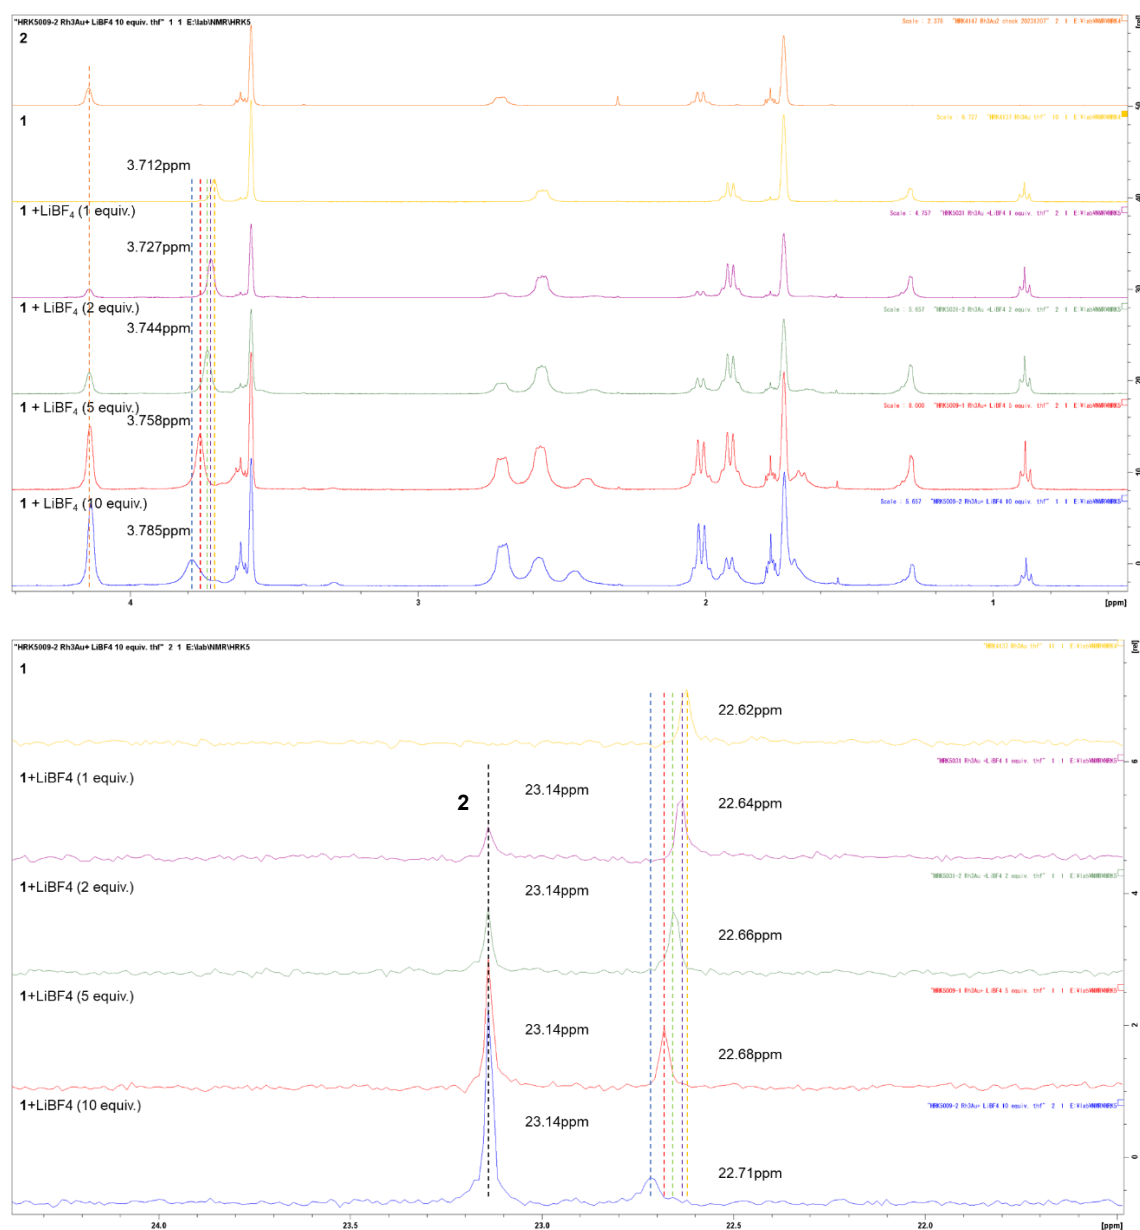

**Figure S1.**  $^1\text{H}$  NMR spectra of a mixture of complex **1** and  $\text{LiBF}_4$  in THF- $d_8$ .

#### 4. X-Ray crystallographic analysis

**Table S1.** Crystal data and data collection parameters of Rh<sub>3</sub>Au complex **1**

---

|                                                     |                                                                                                    |
|-----------------------------------------------------|----------------------------------------------------------------------------------------------------|
| empirical formula                                   | C <sub>42</sub> H <sub>51</sub> O <sub>2</sub> PAuRh <sub>3</sub> (C <sub>6</sub> H <sub>6</sub> ) |
| formula weight                                      | 1202.63                                                                                            |
| crystal system                                      | Monoclinic                                                                                         |
| space group                                         | <i>P</i> 2 <sub>1</sub> / <i>n</i> (#14)                                                           |
| <i>a</i> , Å                                        | 9.4939(5)                                                                                          |
| <i>b</i> , Å                                        | 23.9667(15)                                                                                        |
| <i>c</i> , Å                                        | 18.8664(11)                                                                                        |
| $\alpha$ , deg.                                     | -                                                                                                  |
| $\beta$ , deg.                                      | 97.2108(13)                                                                                        |
| $\gamma$ , deg.                                     | -                                                                                                  |
| <i>V</i> , Å <sup>3</sup>                           | 4258.9(4)                                                                                          |
| <i>Z</i>                                            | 4                                                                                                  |
| <i>D</i> <sub>calcd</sub> , g/cm <sup>3</sup>       | 1.875                                                                                              |
| $\mu$ [Mo- <i>K</i> $\alpha$ ], mm <sup>-1</sup>    | 4.662                                                                                              |
| <i>T</i> , K                                        | 113                                                                                                |
| crystal size, mm                                    | 0.240 x 0.200 x 0.200                                                                              |
| $\theta$ range for data collection (deg.)           |                                                                                                    |
| no. of reflections measured                         | 28557                                                                                              |
| unique data ( <i>R</i> <sub>int</sub> )             | 9613 (0.0170)                                                                                      |
| data / restraints / parameters                      | 9613/0/496                                                                                         |
| <i>R</i> 1 ( <i>I</i> > 2.0 $\sigma$ ( <i>I</i> ))  | 0.0145                                                                                             |
| <i>wR</i> 2 ( <i>I</i> > 2.0 $\sigma$ ( <i>I</i> )) | 0.0350                                                                                             |
| <i>R</i> 1 (all data)                               | 0.0160                                                                                             |
| <i>wR</i> 2 (all data)                              | 0.0350                                                                                             |
| GOF on <i>F</i> <sup>2</sup>                        | 1.067                                                                                              |
| $\Delta\rho$ , e Å <sup>-3</sup>                    | 0.80, -0.80                                                                                        |

---

a)  $R1 = (\sum||F_o| - |F_c||)/\sum|F_o|$     b)  $wR2 = [\sum w(F_o^2 - F_c^2)^2/\sum(wF_o^4)]^{1/2}$

**Table S2.** Crystal data and data collection parameters of Rh<sub>3</sub>Au<sub>2</sub> complex **2**

---

| <b>2</b>                                            |                                                                                                                                                               |
|-----------------------------------------------------|---------------------------------------------------------------------------------------------------------------------------------------------------------------|
| empirical formula                                   | C <sub>60</sub> H <sub>66</sub> O <sub>2</sub> P <sub>2</sub> BF <sub>4</sub> Au <sub>2</sub> Rh <sub>3</sub> (C <sub>6</sub> H <sub>6</sub> ) <sub>0.5</sub> |
| formula weight                                      | 1709.64                                                                                                                                                       |
| crystal system                                      | Triclinic                                                                                                                                                     |
| space group                                         | $P\bar{1}$ (#2)                                                                                                                                               |
| <i>a</i> , Å                                        | 12.8050(13)                                                                                                                                                   |
| <i>b</i> , Å                                        | 15.7979(17)                                                                                                                                                   |
| <i>c</i> , Å                                        | 16.7992(17)                                                                                                                                                   |
| $\alpha$ , deg.                                     | 106.2944(10)                                                                                                                                                  |
| $\beta$ , deg.                                      | 101.4607(11)                                                                                                                                                  |
| $\gamma$ , deg.                                     | 107.842(2)                                                                                                                                                    |
| <i>V</i> , Å <sup>3</sup>                           | 2950.4(5)                                                                                                                                                     |
| <i>Z</i>                                            | 2                                                                                                                                                             |
| <i>D</i> <sub>calcd</sub> , g/cm <sup>3</sup>       | 1.924                                                                                                                                                         |
| $\mu$ [Mo- <i>K</i> $\alpha$ ], mm <sup>-1</sup>    | 5.902                                                                                                                                                         |
| <i>T</i> , K                                        | 113                                                                                                                                                           |
| crystal size, mm                                    | 0.140 x 0.130 x 0.100                                                                                                                                         |
| $\theta$ range for data collection (deg.)           |                                                                                                                                                               |
| no. of reflections measured                         | 42648                                                                                                                                                         |
| unique data ( <i>R</i> <sub>int</sub> )             | 13368(0.0523)                                                                                                                                                 |
| data / restraints / parameters                      | 13368/0/694                                                                                                                                                   |
| <i>R</i> 1 ( <i>I</i> > 2.0 $\sigma$ ( <i>I</i> ))  | 0.0298                                                                                                                                                        |
| <i>wR</i> 2 ( <i>I</i> > 2.0 $\sigma$ ( <i>I</i> )) | 0.0761                                                                                                                                                        |
| <i>R</i> 1 (all data)                               | 0.0352                                                                                                                                                        |
| <i>wR</i> 2 (all data)                              | 0.0782                                                                                                                                                        |
| GOF on <i>F</i> <sup>2</sup>                        | 1.045                                                                                                                                                         |
| $\Delta\rho$ , e Å <sup>-3</sup>                    | 2.23, -2.65                                                                                                                                                   |

---

a)  $R1 = (\sum||F_o| - |F_c||)/\sum|F_o|$     b)  $wR2 = [\sum w(F_o^2 - F_c^2)^2/\sum(wF_o^4)]^{1/2}$

## 5. DFT calculation

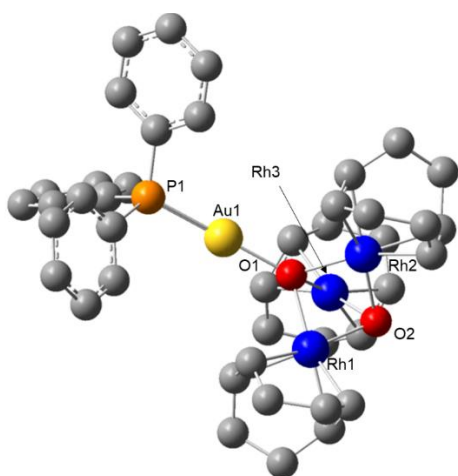

**Figure S2.** Optimized structure of 1.

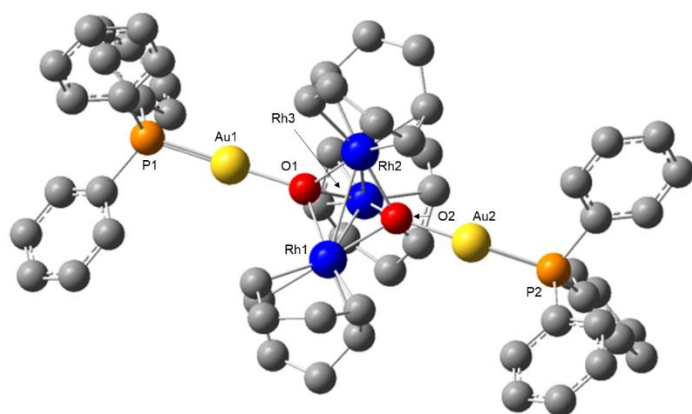

**Figure S3.** Optimized structure of 2.

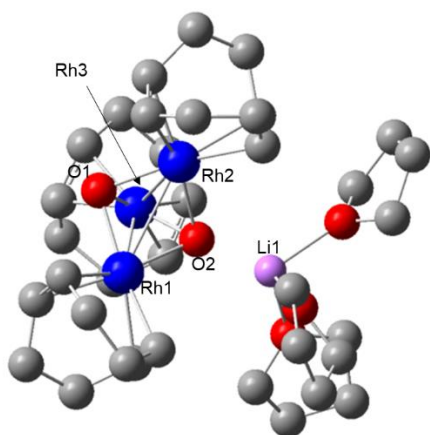

**Figure S4.** Optimized structure of  $(\mu_3\text{-O})\{\text{Rh}(\text{cod})\}_3(\mu_4\text{-O})\text{Li}(\text{THF})_3$ .



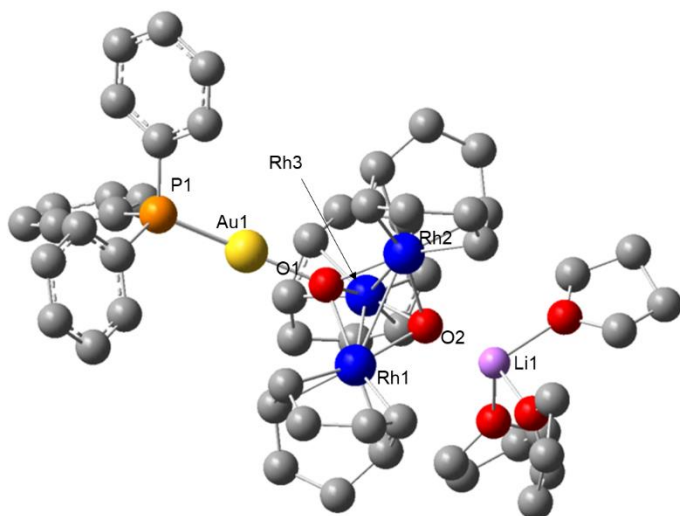

**Figure S5.** Optimized structure of **3**.

**Table S3.** Selected geometries for the optimized molecular structures.

|                 | <b>1</b><br>$M^I = \text{AuPPh}_3$ | <b>2</b><br>$M^I = M^2 = \text{AuPPh}_3$ | <b>3</b><br>$M^I = \text{AuPPh}_3$<br>$M^2 = \text{Li(THF)}_3$ |           |
|-----------------|------------------------------------|------------------------------------------|----------------------------------------------------------------|-----------|
| Rh1 – O1        | 2.09596                            | 2.09666                                  | 2.07637                                                        | 2.03803   |
| Rh2 – O1        | 2.09754                            | 2.09573                                  | 2.09068                                                        | 2.04122   |
| Rh3 – O1        | 2.09260                            | 2.09393                                  | 2.07123                                                        | 2.05932   |
| Rh1 – O2        | 2.06166                            | 2.09543                                  | 2.10704                                                        | 2.11493   |
| Rh2 – O2        | 2.06100                            | 2.09103                                  | 2.08427                                                        | 2.10597   |
| Rh3 – O2        | 2.06018                            | 2.09959                                  | 2.11479                                                        | 2.08109   |
| Rh1 – Rh2       | 2.84212                            | 2.91073                                  | 2.85745                                                        | 2.85213   |
| Rh1 – Rh3       | 2.85230                            | 2.88597                                  | 2.89564                                                        | 2.81594   |
| Rh2 – Rh3       | 2.85235                            | 2.89891                                  | 2.86592                                                        | 2.80991   |
| $M^I$ – O1      | 2.03853                            | 2.04940                                  | 2.05130                                                        | —         |
| $M^2$ – O2      | —                                  | 2.04900                                  | 1.85819                                                        | 1.84184   |
| O1 – O2         | 2.53998                            | 2.52193                                  | 2.54518                                                        | 2.55789   |
| $M^I$ – O1 – O2 | 178.39620                          | 178.90168                                | 179.54337                                                      | 171.52276 |

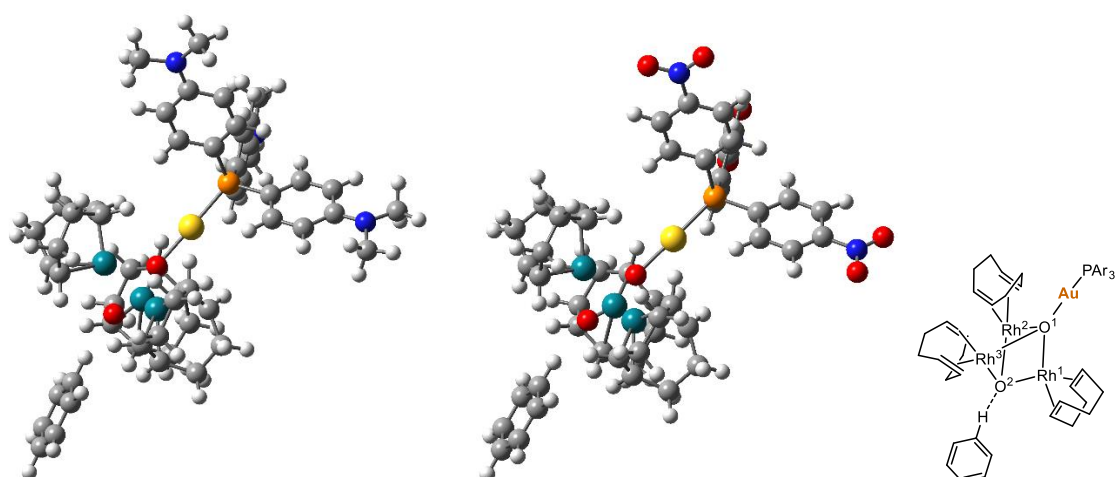

**Figure S6.** Molecular structures of **1-C<sub>6</sub>H<sub>6</sub>** with P(4-MeOC<sub>6</sub>H<sub>4</sub>)<sub>3</sub> (left) and P(4-NO<sub>2</sub>C<sub>6</sub>H<sub>4</sub>)<sub>3</sub> (right) ligands on the gold(I) center.

**Table S4** Selected parameters for the C-H···O interaction.

|                               | L = PPh <sub>3</sub> | L = P(4-NMe <sub>2</sub> OC <sub>6</sub> H <sub>4</sub> ) <sub>3</sub> | L = P(4-NO <sub>2</sub> C <sub>6</sub> H <sub>4</sub> ) <sub>3</sub> |
|-------------------------------|----------------------|------------------------------------------------------------------------|----------------------------------------------------------------------|
| Rh1 – O1                      | 2.10435              | 2.09963                                                                | 2.10829                                                              |
| Rh2 – O1                      | 2.10006              | 2.09542                                                                | 2.10414                                                              |
| Rh3 – O1                      | 2.10387              | 2.10007                                                                | 2.10958                                                              |
| Rh1 – O2                      | 2.05110              | 2.05216                                                                | 2.05096                                                              |
| Rh2 – O2                      | 2.05307              | 2.05409                                                                | 2.05263                                                              |
| Rh3 – O2                      | 2.04989              | 2.05079                                                                | 2.04860                                                              |
| Rh1 – Rh2                     | 2.86391              | 2.86197                                                                | 2.86828                                                              |
| Rh1 – Rh3                     | 2.84261              | 2.83924                                                                | 2.84604                                                              |
| Rh2 – Rh3                     | 2.84376              | 2.84118                                                                | 2.84745                                                              |
| Au – O1                       | 2.01442              | 2.02556                                                                | 1.99892                                                              |
| Au – P1                       | 2.26293              | 2.26772                                                                | 2.25534                                                              |
| O1 – O2                       | 2.53400              | 2.53253                                                                | 2.53453                                                              |
| H – O2                        | 2.04682              | 2.03931                                                                | 2.05938                                                              |
| C – H                         | 1.09086              | 1.09117                                                                | 1.09035                                                              |
| C – H – O2                    | 172.63881            | 173.06935                                                              | 171.97504                                                            |
| donor-acceptor<br>interaction | 6.09                 | 6.27                                                                   | 5.75                                                                 |

## 6. Cartesian Coordinates of Optimized Structures

Function: B3LYP(GD3BJ)

Basis set: SDD for Rh, Au and 6-31G(d) for H, C, O, P

Solvent: THF (SMD)

### Rh<sub>3</sub>Au complex 1

|             |            |             |             |
|-------------|------------|-------------|-------------|
| Energy      | -2590.1307 |             |             |
| Enthalpy    | -2590.1298 |             |             |
| Free energy | -2590.268  |             |             |
| Au          | 3.78875259 | 3.10072870  | 3.64646001  |
| Rh          | 4.13160966 | -0.49243653 | 4.63502371  |
| Rh          | 6.35872929 | 0.47459618  | 3.13813320  |
| Rh          | 6.06623382 | 1.20075769  | 5.87030356  |
| P           | 2.68592639 | 4.98418561  | 3.04144118  |
| O           | 4.82379589 | 1.43349648  | 4.19840785  |
| O           | 6.17361732 | -0.60609304 | 4.88329036  |
| C           | 2.11955091 | 0.04873441  | 5.06062002  |
| H           | 2.10697599 | 1.13086304  | 5.20749446  |
| C           | 2.18545085 | -0.40987062 | 3.72797617  |
| H           | 2.23692133 | 0.35176430  | 2.94868429  |
| C           | 1.70377818 | -1.78477264 | 3.27334015  |
| H           | 1.29481903 | -1.70680687 | 2.25875960  |
| H           | 0.87574455 | -2.11715032 | 3.90930969  |
| C           | 2.84186431 | -2.83072668 | 3.28174122  |
| H           | 2.42744740 | -3.84869474 | 3.37296360  |
| H           | 3.36201206 | -2.79449153 | 2.31680739  |
| C           | 3.87984961 | -2.56910372 | 4.35957649  |
| H           | 4.86813076 | -2.97645578 | 4.14386181  |
| C           | 3.60265336 | -2.25369657 | 5.70966784  |
| H           | 4.40112988 | -2.43509822 | 6.42884385  |
| C           | 2.19394398 | -2.18382413 | 6.29564586  |
| H           | 2.21917756 | -2.52830125 | 7.33637495  |
| H           | 1.53493172 | -2.87805332 | 5.76225319  |
| C           | 1.61680630 | -0.75122291 | 6.24962988  |
| H           | 0.51444533 | -0.78026510 | 6.27031595  |
| H           | 1.92891509 | -0.21534755 | 7.15455277  |
| C           | 6.87252235 | 2.11745406  | 1.89007773  |
| H           | 6.42018471 | 3.00544062  | 2.33721764  |
| C           | 6.01400265 | 1.26239949  | 1.16737386  |
| H           | 4.96235449 | 1.54836523  | 1.12044431  |
| C           | 6.48615338 | 0.30798499  | 0.07412127  |
| H           | 7.36913890 | 0.72317300  | -0.42469059 |

|   |             |             |             |
|---|-------------|-------------|-------------|
| H | 5.71042996  | 0.22999926  | -0.69710439 |
| C | 6.79445686  | -1.10197061 | 0.62763143  |
| H | 5.87191215  | -1.69521992 | 0.61726570  |
| H | 7.50754357  | -1.62581492 | -0.03074760 |
| C | 7.29632740  | -1.07963052 | 2.06139754  |
| H | 7.11540852  | -2.00017781 | 2.61743057  |
| C | 8.29172811  | -0.21400203 | 2.57073040  |
| H | 8.79437659  | -0.52953020 | 3.48479600  |
| C | 9.05207094  | 0.80087824  | 1.71981487  |
| H | 9.13566062  | 0.43363951  | 0.69082557  |
| H | 10.07843260 | 0.88959452  | 2.09546186  |
| C | 8.38193500  | 2.19285236  | 1.74097716  |
| H | 8.76388233  | 2.75625041  | 2.60126319  |
| H | 8.66319170  | 2.76820190  | 0.84297280  |
| C | 5.23121854  | 2.76587819  | 7.04259966  |
| H | 4.26759912  | 3.01690605  | 6.59404987  |
| C | 6.38179565  | 3.26012628  | 6.39257452  |
| H | 6.22084750  | 3.84234171  | 5.48423325  |
| C | 7.72396421  | 3.47956054  | 7.08461496  |
| H | 7.56170645  | 3.72635713  | 8.13988218  |
| H | 8.22024801  | 4.35139666  | 6.64163428  |
| C | 8.65053071  | 2.24901911  | 6.95613061  |
| H | 9.21962782  | 2.33139245  | 6.02200301  |
| H | 9.39226814  | 2.23936874  | 7.77223565  |
| C | 7.88846525  | 0.93594761  | 6.90020325  |
| H | 8.41708771  | 0.12865779  | 6.39241481  |
| C | 6.82669714  | 0.56242570  | 7.75598885  |
| H | 6.61326434  | -0.50328259 | 7.83601273  |
| C | 6.32682419  | 1.42225037  | 8.91479680  |
| H | 7.15162081  | 2.02395345  | 9.31268570  |
| H | 6.00316007  | 0.76999228  | 9.73467747  |
| C | 5.15079491  | 2.33252763  | 8.49589792  |
| H | 4.21282315  | 1.77641486  | 8.61635983  |
| H | 5.08282444  | 3.20531655  | 9.16688504  |
| C | 0.91604439  | 4.94965806  | 3.48591956  |
| C | 0.25809838  | 6.06886367  | 4.01277196  |
| H | 0.80179066  | 6.99268422  | 4.18457239  |
| C | -1.10314766 | 5.99554812  | 4.32342043  |
| H | -1.60800534 | 6.86526580  | 4.73526424  |
| C | -1.81023619 | 4.80945226  | 4.10707022  |
| H | -2.86769619 | 4.75451578  | 4.35133194  |
| C | -1.15390182 | 3.68935232  | 3.58371732  |
| H | -1.69753553 | 2.76255415  | 3.42183169  |

|   |            |            |             |
|---|------------|------------|-------------|
| C | 0.20597772 | 3.75569821 | 3.27926648  |
| H | 0.71809620 | 2.88095630 | 2.88690286  |
| C | 2.74459066 | 5.29342945 | 1.24373305  |
| C | 3.89760865 | 4.91249810 | 0.53908243  |
| H | 4.71225894 | 4.41738427 | 1.06067071  |
| C | 3.99328038 | 5.15924656 | -0.83125500 |
| H | 4.88762524 | 4.85994988 | -1.37096176 |
| C | 2.93582262 | 5.77810686 | -1.50693859 |
| H | 3.00790118 | 5.96347400 | -2.57529690 |
| C | 1.78248360 | 6.15009174 | -0.80919207 |
| H | 0.95720956 | 6.62567683 | -1.33222634 |
| C | 1.68465061 | 5.90988306 | 0.56397724  |
| H | 0.78531952 | 6.19778755 | 1.10008149  |
| C | 3.38242942 | 6.47106960 | 3.83852810  |
| C | 3.86152019 | 6.35615929 | 5.15367635  |
| H | 3.83400076 | 5.39409949 | 5.65822001  |
| C | 4.38233964 | 7.47276742 | 5.80881719  |
| H | 4.75343603 | 7.37588808 | 6.82546897  |
| C | 4.43720871 | 8.70740070 | 5.15246999  |
| H | 4.85052517 | 9.57479540 | 5.66012282  |
| C | 3.96920460 | 8.82248649 | 3.84000725  |
| H | 4.01636938 | 9.77828236 | 3.32518208  |
| C | 3.44136212 | 7.70801370 | 3.18200913  |
| H | 3.08253361 | 7.80414388 | 2.16189406  |

### **Rh<sub>3</sub>Au<sub>2</sub> complex 2**

|             |              |            |             |
|-------------|--------------|------------|-------------|
| Energy      | -3762.012002 |            |             |
| Enthalpy    | -3762.011057 |            |             |
| Free energy | -3762.198906 |            |             |
| Au          | 0.73346984   | 2.91588218 | 11.41461108 |
| Au          | -2.48702766  | 0.94067047 | 5.97839870  |
| Rh          | -2.16448013  | 1.39791437 | 9.63723736  |
| Rh          | -0.85899721  | 3.49972652 | 8.12668561  |
| Rh          | 0.36307314   | 0.86736259 | 8.34929270  |
| P           | 1.86836230   | 3.62094499 | 13.24376515 |
| P           | -3.59479219  | 0.23904028 | 4.13142287  |
| O           | -1.48842495  | 1.56196388 | 7.65624979  |
| O           | -0.27681867  | 2.29807443 | 9.74198784  |
| C           | 2.82124303   | 5.14179559 | 12.91767920 |
| C           | 4.08173165   | 5.36059416 | 13.49015347 |
| H           | 4.52809026   | 4.60862057 | 14.13380298 |
| C           | 4.76918620   | 6.54892840 | 13.22747877 |
| H           | 5.74748411   | 6.71324741 | 13.67097148 |

|   |             |             |             |
|---|-------------|-------------|-------------|
| C | 4.20224242  | 7.51966353  | 12.39622720 |
| H | 4.74066202  | 8.44097906  | 12.19098591 |
| C | 2.94489498  | 7.30155598  | 11.82162464 |
| H | 2.50441154  | 8.04983971  | 11.16837194 |
| C | 2.25714542  | 6.11452796  | 12.07655133 |
| H | 1.28743130  | 5.93923213  | 11.61826378 |
| C | 3.07509035  | 2.38451951  | 13.82905673 |
| C | 3.80558345  | 1.66702716  | 12.86762856 |
| H | 3.62429750  | 1.83802532  | 11.80966269 |
| C | 4.75768172  | 0.72971847  | 13.26910788 |
| H | 5.31947598  | 0.17787513  | 12.52037250 |
| C | 4.97807283  | 0.49503605  | 14.63124277 |
| H | 5.71438831  | -0.24030988 | 14.94384878 |
| C | 4.24517177  | 1.20093370  | 15.58955117 |
| H | 4.41038063  | 1.01703200  | 16.64770083 |
| C | 3.29496606  | 2.14631848  | 15.19207699 |
| H | 2.72831002  | 2.68988976  | 15.94179547 |
| C | 0.77914717  | 3.99225719  | 14.65814386 |
| C | -0.36345663 | 3.19833205  | 14.84652382 |
| H | -0.59306613 | 2.40431684  | 14.14088739 |
| C | -1.20694848 | 3.43382322  | 15.93305674 |
| H | -2.09041224 | 2.81703742  | 16.07338513 |
| C | -0.92016276 | 4.46847505  | 16.83047145 |
| H | -1.58154248 | 4.65667991  | 17.67184867 |
| C | 0.21236977  | 5.26599830  | 16.63987816 |
| H | 0.43436282  | 6.07362362  | 17.33207221 |
| C | 1.06321756  | 5.03031470  | 15.55658602 |
| H | 1.93962732  | 5.65480734  | 15.41233484 |
| C | -0.85923940 | 5.33322596  | 9.18185875  |
| H | -0.84807212 | 5.07761637  | 10.24322151 |
| C | -2.04773224 | 6.17372962  | 8.75305113  |
| H | -1.88067412 | 7.23649306  | 8.99187618  |
| H | -2.90590613 | 5.85183522  | 9.35502899  |
| C | -2.39364098 | 6.00414937  | 7.25722215  |
| H | -3.46139035 | 6.20198525  | 7.10933335  |
| H | -1.85876013 | 6.74591506  | 6.65456097  |
| C | -2.06974314 | 4.60151658  | 6.75262021  |
| H | -2.93067354 | 3.97028947  | 6.52894619  |
| C | -0.84735389 | 4.24440445  | 6.14515198  |
| H | -0.86398404 | 3.37359672  | 5.48660926  |
| C | 0.34689823  | 5.15935704  | 5.94497195  |
| H | 0.18566498  | 5.82982965  | 5.08539014  |
| H | 1.20191702  | 4.52349560  | 5.68609140  |

|   |             |             |             |
|---|-------------|-------------|-------------|
| C | 0.69582840  | 5.97584643  | 7.20906406  |
| H | 1.76540552  | 6.21474487  | 7.19966507  |
| H | 0.16793868  | 6.93552228  | 7.20311632  |
| C | 0.36422951  | 5.21483918  | 8.48893839  |
| H | 1.22202757  | 4.86596545  | 9.06501382  |
| C | 2.43487310  | 0.75951380  | 8.86132275  |
| H | 2.68812537  | 1.71827511  | 9.31580732  |
| C | 3.30653318  | 0.33846074  | 7.68215492  |
| H | 3.69498382  | -0.67124493 | 7.85260439  |
| H | 4.18069412  | 0.99733261  | 7.62791732  |
| C | 2.53863345  | 0.40221539  | 6.34329266  |
| H | 2.62691372  | 1.41408381  | 5.92994184  |
| H | 2.99538525  | -0.27612845 | 5.60461499  |
| C | 1.05799949  | 0.10787225  | 6.49911647  |
| H | 0.42677799  | 0.54651946  | 5.72407760  |
| C | 0.50163803  | -0.95471002 | 7.24249425  |
| H | -0.52096554 | -1.24187914 | 6.99462365  |
| C | 1.32561941  | -2.01544807 | 7.96572339  |
| H | 0.79312140  | -2.97260960 | 7.92660708  |
| H | 2.27319097  | -2.17086991 | 7.43867978  |
| C | 1.58291915  | -1.63771466 | 9.44084561  |
| H | 0.74211561  | -1.99097002 | 10.04978929 |
| H | 2.48053265  | -2.15216647 | 9.82021902  |
| C | 1.69080672  | -0.13952755 | 9.65477255  |
| H | 1.44127220  | 0.19018563  | 10.66523968 |
| C | -3.51483833 | -1.15041300 | 10.43344290 |
| H | -2.70354532 | -1.85629281 | 10.21875394 |
| H | -4.44261035 | -1.74390308 | 10.46982140 |
| C | -3.55738321 | -0.15596306 | 9.28800033  |
| H | -3.31125101 | -0.58070625 | 8.31279143  |
| C | -4.24763172 | 1.07499505  | 9.28654562  |
| H | -4.46617979 | 1.51314755  | 8.31181901  |
| C | -5.11701163 | 1.56831076  | 10.43906144 |
| H | -5.55106680 | 0.71244947  | 10.96698967 |
| H | -5.96114567 | 2.13835006  | 10.03449141 |
| C | -4.32394440 | 2.46169968  | 11.41821874 |
| H | -4.35865314 | 3.49808919  | 11.06154306 |
| H | -4.79777399 | 2.45892213  | 12.41309716 |
| C | -2.86117982 | 2.07017746  | 11.51834029 |
| H | -2.19681753 | 2.88129512  | 11.82270432 |
| C | -2.36518820 | 0.75677862  | 11.66415366 |
| H | -1.35245345 | 0.65762549  | 12.05663797 |
| C | -3.24729193 | -0.48060853 | 11.79945179 |

|   |             |             |             |
|---|-------------|-------------|-------------|
| H | -4.19098900 | -0.21036817 | 12.28513766 |
| H | -2.75674737 | -1.20108452 | 12.46387664 |
| C | -4.87570656 | -0.99972744 | 4.52226455  |
| C | -5.17417106 | -2.05820375 | 3.65306500  |
| H | -4.62603293 | -2.17487329 | 2.72323728  |
| C | -6.17950516 | -2.97045675 | 3.98545136  |
| H | -6.40566467 | -3.79101347 | 3.31001803  |
| C | -6.88948730 | -2.82932094 | 5.18162536  |
| H | -7.66895581 | -3.54159280 | 5.43813133  |
| C | -6.59116246 | -1.77509928 | 6.05207013  |
| H | -7.13453600 | -1.66599615 | 6.98667414  |
| C | -5.58438883 | -0.86514772 | 5.72712016  |
| H | -5.34291218 | -0.05534641 | 6.41023385  |
| C | -2.48941712 | -0.52938660 | 2.90133807  |
| C | -1.38767312 | -1.26698020 | 3.36342643  |
| H | -1.19555296 | -1.34036952 | 4.43061527  |
| C | -0.53514448 | -1.89367004 | 2.45353636  |
| H | 0.31723291  | -2.46154912 | 2.81634904  |
| C | -0.77243615 | -1.77952013 | 1.07918525  |
| H | -0.10398321 | -2.26132469 | 0.37082962  |
| C | -1.86404385 | -1.03809467 | 0.61661699  |
| H | -2.04732073 | -0.94353835 | -0.45026241 |
| C | -2.72343246 | -0.41299135 | 1.52410368  |
| H | -3.56775480 | 0.16450357  | 1.15991959  |
| C | -4.44523654 | 1.60308907  | 3.26947292  |
| C | -3.77088149 | 2.82880282  | 3.14547598  |
| H | -2.77934595 | 2.94741275  | 3.57452011  |
| C | -4.37497650 | 3.89465182  | 2.47842465  |
| H | -3.84857179 | 4.84062167  | 2.38547888  |
| C | -5.65901266 | 3.74694329  | 1.94099364  |
| H | -6.13244352 | 4.57977597  | 1.42818158  |
| C | -6.33529023 | 2.53065489  | 2.07087350  |
| H | -7.33407731 | 2.41441009  | 1.65896003  |
| C | -5.73105967 | 1.45741971  | 2.73263750  |
| H | -6.26222149 | 0.51582192  | 2.83086184  |

### **Rh<sub>3</sub>AuLi complex 3**

|             |              |            |             |
|-------------|--------------|------------|-------------|
| Energy      | -3294.754505 |            |             |
| Enthalpy    | -3294.753561 |            |             |
| Free energy | -3294.938105 |            |             |
| Symbol      | X            | Y          | Z           |
| Au          |              | 3.92808522 | 3.11524133  |
| Rh          |              | 4.39259973 | -0.41855326 |
|             |              |            | 3.67479952  |
|             |              |            | 4.61045724  |



|    |             |             |             |
|----|-------------|-------------|-------------|
| Rh | 6.50787801  | 0.55157988  | 2.93774588  |
| Rh | 6.44835292  | 1.31028533  | 5.69199162  |
| P  | 2.64456016  | 4.91246556  | 3.16968765  |
| O  | 5.07505445  | 1.48055661  | 4.14396847  |
| C  | 2.46443930  | 0.21538758  | 5.22641781  |
| H  | 2.54480326  | 1.28294529  | 5.44066080  |
| C  | 2.39978336  | -0.15167142 | 3.86594012  |
| H  | 2.45623716  | 0.65967046  | 3.13891940  |
| C  | 1.77731976  | -1.44611307 | 3.35680077  |
| H  | 1.29241532  | -1.25984088 | 2.39137292  |
| H  | 0.98516284  | -1.77243561 | 4.03905408  |
| C  | 2.83734764  | -2.55479708 | 3.19128580  |
| H  | 2.36595523  | -3.55086900 | 3.22490175  |
| H  | 3.29653918  | -2.46207908 | 2.19932730  |
| C  | 3.95086014  | -2.45199731 | 4.21605604  |
| H  | 4.88358329  | -2.91530811 | 3.90900382  |
| C  | 3.79200278  | -2.22707033 | 5.59824671  |
| H  | 4.62311262  | -2.53537648 | 6.22050894  |
| C  | 2.44570726  | -2.09450007 | 6.30255147  |
| H  | 2.52960709  | -2.50828152 | 7.31436012  |
| H  | 1.69310091  | -2.70177313 | 5.78745213  |
| C  | 1.98248701  | -0.62406471 | 6.39431408  |
| H  | 0.88576658  | -0.56918654 | 6.49028678  |
| H  | 2.39516052  | -0.17763169 | 7.30736900  |
| C  | 6.83885012  | 2.22708784  | 1.67730399  |
| H  | 6.42120041  | 3.09263150  | 2.19626971  |
| C  | 5.92019085  | 1.36577262  | 1.04193196  |
| H  | 4.86430690  | 1.62420968  | 1.13108128  |
| C  | 6.27517353  | 0.44781204  | -0.12338000 |
| H  | 7.08537136  | 0.89189355  | -0.71200511 |
| H  | 5.41459649  | 0.37255340  | -0.79827400 |
| C  | 6.67059408  | -0.96593622 | 0.35727697  |
| H  | 5.76359677  | -1.57606379 | 0.44919007  |
| H  | 7.30515412  | -1.46492160 | -0.39376604 |
| C  | 7.34803537  | -0.95750719 | 1.71488564  |
| H  | 7.27069495  | -1.88941622 | 2.26946440  |
| C  | 8.37625920  | -0.07879783 | 2.11767589  |
| H  | 8.99121285  | -0.40917699 | 2.95101968  |
| C  | 9.01013136  | 0.97431965  | 1.21379345  |
| H  | 8.98213069  | 0.63342528  | 0.17294442  |
| H  | 10.07075693 | 1.07886672  | 1.47146943  |
| C  | 8.31614313  | 2.34705503  | 1.35126106  |
| H  | 8.78500603  | 2.90060879  | 2.17390940  |

|   |             |             |             |
|---|-------------|-------------|-------------|
| H | 8.47130605  | 2.95036844  | 0.44178870  |
| C | 5.56822315  | 2.75630764  | 6.96352878  |
| H | 4.52826034  | 2.85205905  | 6.64488861  |
| C | 6.53819997  | 3.40375893  | 6.16959171  |
| H | 6.17487343  | 3.93391104  | 5.28831277  |
| C | 7.90526409  | 3.83948321  | 6.68176517  |
| H | 7.84854190  | 4.06472160  | 7.75222952  |
| H | 8.19658791  | 4.77361362  | 6.18750685  |
| C | 8.97531367  | 2.76159847  | 6.41285296  |
| H | 9.38592579  | 2.91026407  | 5.40650743  |
| H | 9.82009107  | 2.86883480  | 7.11332155  |
| C | 8.41390577  | 1.35367855  | 6.46579349  |
| H | 8.98160681  | 0.62503989  | 5.89763202  |
| C | 7.55842132  | 0.83476422  | 7.46030667  |
| H | 7.55889091  | -0.24521738 | 7.57191592  |
| C | 7.08174983  | 1.62072686  | 8.67812143  |
| H | 7.85129050  | 2.33976638  | 8.98116198  |
| H | 6.95803269  | 0.93389518  | 9.52394009  |
| C | 5.74158098  | 2.34343026  | 8.41415909  |
| H | 4.91785605  | 1.66084685  | 8.65598277  |
| H | 5.63269880  | 3.21178484  | 9.08448844  |
| C | 0.90956518  | 4.68468544  | 3.68693494  |
| C | 0.14289324  | 5.73498077  | 4.20993136  |
| H | 0.57896473  | 6.72106479  | 4.33714494  |
| C | -1.18795625 | 5.51150218  | 4.57471075  |
| H | -1.77779771 | 6.32788376  | 4.98255348  |
| C | -1.75644889 | 4.24398740  | 4.41793935  |
| H | -2.79043743 | 4.07295613  | 4.70505923  |
| C | -0.99157708 | 3.19337851  | 3.89850551  |
| H | -1.42660538 | 2.20439722  | 3.78268832  |
| C | 0.33877975  | 3.41022612  | 3.53833340  |
| H | 0.93733233  | 2.59052641  | 3.14977049  |
| C | 2.59859274  | 5.26926164  | 1.38146150  |
| C | 3.75444075  | 5.02290759  | 0.62358854  |
| H | 4.63528798  | 4.60195605  | 1.10091219  |
| C | 3.76888099  | 5.30760436  | -0.74254486 |
| H | 4.66583932  | 5.11210276  | -1.32386787 |
| C | 2.62761980  | 5.83016187  | -1.36080055 |
| H | 2.63675431  | 6.04451813  | -2.42607019 |
| C | 1.47225385  | 6.06784051  | -0.60987112 |
| H | 0.58272595  | 6.46805514  | -1.08873723 |
| C | 1.45473652  | 5.78896722  | 0.75940506  |
| H | 0.55309967  | 5.97195094  | 1.33600960  |

|    |             |             |            |
|----|-------------|-------------|------------|
| C  | 3.22887988  | 6.43635568  | 3.98498549 |
| C  | 3.76491381  | 6.33258704  | 5.27893634 |
| H  | 3.84928049  | 5.35878273  | 5.75394569 |
| C  | 4.19841634  | 7.47665650  | 5.94991251 |
| H  | 4.61293892  | 7.38954620  | 6.95056102 |
| C  | 4.10947230  | 8.72808799  | 5.32987807 |
| H  | 4.45361682  | 9.61781158  | 5.85026452 |
| C  | 3.58598795  | 8.83244470  | 4.03767947 |
| H  | 3.52142204  | 9.80189922  | 3.55120940 |
| C  | 3.14517135  | 7.68996293  | 3.36383397 |
| H  | 2.74328745  | 7.77711885  | 2.35905340 |
| Li | 7.53575708  | -1.97881064 | 5.29311078 |
| O  | 7.88556536  | -3.54681772 | 4.06489008 |
| C  | 9.21551828  | -4.12379848 | 3.98539774 |
| C  | 6.95508496  | -4.35916507 | 3.30545398 |
| C  | 9.02712753  | -5.52168921 | 3.40375988 |
| H  | 9.82479773  | -3.49133131 | 3.32866795 |
| H  | 9.64744736  | -4.11749807 | 4.98781085 |
| C  | 7.81177144  | -5.32316805 | 2.48897759 |
| H  | 6.30241975  | -4.89007700 | 4.01005666 |
| H  | 6.34442076  | -3.69776598 | 2.68733791 |
| H  | 8.79478924  | -6.24057497 | 4.19889274 |
| H  | 9.91836436  | -5.86968718 | 2.87278626 |
| H  | 7.28113789  | -6.25211844 | 2.25969015 |
| H  | 8.11643815  | -4.85463584 | 1.54545136 |
| O  | 9.46605889  | -1.72063804 | 5.94269675 |
| C  | 9.92095601  | -2.15066718 | 7.23814621 |
| C  | 10.63344740 | -1.22612891 | 5.25605191 |
| C  | 10.92379479 | -1.08122606 | 7.67345080 |
| H  | 9.04917142  | -2.23664986 | 7.88412833 |
| H  | 10.39920249 | -3.13734912 | 7.14267554 |
| C  | 11.53616785 | -0.59470607 | 6.33616761 |
| H  | 11.13521232 | -2.06541635 | 4.75767398 |
| H  | 10.29425177 | -0.51837817 | 4.49867640 |
| H  | 11.67320343 | -1.48331770 | 8.36198427 |
| H  | 10.39938638 | -0.26300868 | 8.17574352 |
| H  | 12.57073197 | -0.92951704 | 6.21451484 |
| H  | 11.52721020 | 0.49697072  | 6.27299755 |
| O  | 6.84919479  | -2.92202224 | 6.92876167 |
| C  | 7.04597189  | -4.33351837 | 7.12700761 |
| C  | 6.23250247  | -2.42382829 | 8.13581736 |
| C  | 5.76247073  | -4.79780853 | 7.81278301 |
| H  | 7.22793288  | -4.77933553 | 6.14946022 |

|   |            |             |            |
|---|------------|-------------|------------|
| H | 7.92609552 | -4.49173063 | 7.76808860 |
| C | 5.37301781 | -3.58180690 | 8.68947249 |
| H | 7.02089656 | -2.14213055 | 8.84642334 |
| H | 5.66575036 | -1.53179314 | 7.86570582 |
| H | 5.91364043 | -5.71138184 | 8.39563402 |
| H | 4.99084849 | -4.99320335 | 7.06103376 |
| H | 5.60272101 | -3.75651031 | 9.74497129 |
| H | 4.30500008 | -3.36095366 | 8.61142023 |
| O | 6.50104606 | -0.55124599 | 4.70633204 |

### **Rh<sub>3</sub>Li complex**

|             |              |             |            |
|-------------|--------------|-------------|------------|
| Energy      | -2122.871666 |             |            |
| Enthalpy    | -2122.870721 |             |            |
| Free energy | -2123.007195 |             |            |
| Rh          | 4.37502372   | -0.60590344 | 4.73432806 |
| Rh          | 6.31377256   | 0.55198015  | 3.05204540 |
| Rh          | 6.33663641   | 1.17390472  | 5.79216578 |
| O           | 4.90656590   | 1.32232015  | 4.34321725 |
| C           | 2.48154601   | -0.08189557 | 5.51204559 |
| H           | 2.55093157   | 0.96314503  | 5.81651089 |
| C           | 2.34338164   | -0.33275260 | 4.12731922 |
| H           | 2.33720383   | 0.53771817  | 3.47196850 |
| C           | 1.71501422   | -1.59692147 | 3.54904729 |
| H           | 1.17783802   | -1.34559627 | 2.62639062 |
| H           | 0.96208330   | -1.99207820 | 4.24036150 |
| C           | 2.78045083   | -2.67153469 | 3.24246236 |
| H           | 2.32421926   | -3.67635975 | 3.23177390 |
| H           | 3.17447856   | -2.50047114 | 2.23284401 |
| C           | 3.95773520   | -2.61962386 | 4.20048052 |
| H           | 4.87645445   | -3.03307793 | 3.79423854 |
| C           | 3.87713053   | -2.52151335 | 5.60487370 |
| H           | 4.74552785   | -2.86517721 | 6.15606404 |
| C           | 2.56390262   | -2.48088956 | 6.38041794 |
| H           | 2.69668900   | -2.98413745 | 7.34604402 |
| H           | 1.79560684   | -3.05272165 | 5.84713015 |
| C           | 2.08143055   | -1.03367925 | 6.62605900 |
| H           | 0.99074751   | -1.01327600 | 6.79152394 |
| H           | 2.54052886   | -0.66102657 | 7.55051922 |
| C           | 6.40991947   | 2.31288288  | 1.87923229 |
| H           | 5.94451824   | 3.10447368  | 2.46745058 |
| C           | 5.54014712   | 1.39565652  | 1.24698017 |
| H           | 4.47194287   | 1.54424850  | 1.40403310 |
| C           | 5.91310860   | 0.58173186  | 0.00979534 |

|    |            |             |             |
|----|------------|-------------|-------------|
| H  | 6.63805709 | 1.13637613  | -0.59676147 |
| H  | 5.02462129 | 0.45511408  | -0.62079540 |
| C  | 6.47625596 | -0.80920102 | 0.37931542  |
| H  | 5.64007987 | -1.51204430 | 0.48371779  |
| H  | 7.10701064 | -1.19752209 | -0.43884508 |
| C  | 7.22891789 | -0.80704943 | 1.69817243  |
| H  | 7.27668280 | -1.77386642 | 2.19624470  |
| C  | 8.18940449 | 0.14927980  | 2.09269895  |
| H  | 8.88845335 | -0.15823439 | 2.86784963  |
| C  | 8.65853827 | 1.30626545  | 1.21411331  |
| H  | 8.59764564 | 1.01986201  | 0.15783245  |
| H  | 9.71921242 | 1.50404597  | 1.41309272  |
| C  | 7.84499260 | 2.59497305  | 1.46917505  |
| H  | 8.31307692 | 3.15153402  | 2.29074546  |
| H  | 7.88366456 | 3.25510627  | 0.58596246  |
| C  | 5.37711005 | 2.49167487  | 7.13386638  |
| H  | 4.32287708 | 2.50687356  | 6.85418948  |
| C  | 6.26107180 | 3.24604160  | 6.32868055  |
| H  | 5.82315747 | 3.76964337  | 5.47954770  |
| C  | 7.60034962 | 3.78751506  | 6.81904333  |
| H  | 7.55670832 | 3.97667223  | 7.89771707  |
| H  | 7.79502859 | 4.75874012  | 6.34791788  |
| C  | 8.75516149 | 2.81840145  | 6.49001748  |
| H  | 9.12065157 | 3.03335310  | 5.47786185  |
| H  | 9.60803053 | 2.98559429  | 7.17043883  |
| C  | 8.32183824 | 1.36398608  | 6.51280608  |
| H  | 8.93850400 | 0.70627938  | 5.90839416  |
| C  | 7.55112259 | 0.74485152  | 7.51923220  |
| H  | 7.65407048 | -0.33260352 | 7.60300863  |
| C  | 7.04541388 | 1.45541506  | 8.77151989  |
| H  | 7.75604061 | 2.23393928  | 9.07362290  |
| H  | 7.00989650 | 0.74087459  | 9.60358767  |
| C  | 5.63803465 | 2.06275197  | 8.56826662  |
| H  | 4.88706240 | 1.30308609  | 8.81893174  |
| H  | 5.47579642 | 2.90123828  | 9.26689859  |
| Li | 7.59497635 | -2.01165573 | 5.29807441  |
| O  | 8.01318291 | -3.54678619 | 4.06005532  |
| C  | 9.32234234 | -4.16905174 | 4.03307475  |
| C  | 7.07377672 | -4.34887877 | 3.30307035  |
| C  | 9.09892493 | -5.58072200 | 3.49768421  |
| H  | 9.96862652 | -3.58399029 | 3.36757566  |
| H  | 9.73365462 | -4.13934037 | 5.04415436  |
| C  | 7.91472885 | -5.37270179 | 2.54420548  |

|   |             |             |            |
|---|-------------|-------------|------------|
| H | 6.38342917  | -4.83085818 | 4.00658518 |
| H | 6.50545099  | -3.68483343 | 2.64861384 |
| H | 8.81996469  | -6.26107043 | 4.31170368 |
| H | 9.99012884  | -5.98006868 | 3.00381920 |
| H | 7.35651919  | -6.29015792 | 2.33441508 |
| H | 8.26044611  | -4.95140008 | 1.59257496 |
| O | 9.51466218  | -1.68147392 | 5.89800207 |
| C | 10.04917375 | -2.05324277 | 7.17839400 |
| C | 10.61551337 | -1.14236220 | 5.14306586 |
| C | 11.02103465 | -0.92715259 | 7.53910815 |
| H | 9.21278736  | -2.16173265 | 7.86780496 |
| H | 10.56902907 | -3.01941620 | 7.08643998 |
| C | 11.53056101 | -0.43149994 | 6.16167940 |
| H | 11.14196239 | -1.96576064 | 4.64258159 |
| H | 10.19679775 | -0.47904927 | 4.38501590 |
| H | 11.82872476 | -1.28051838 | 8.18753861 |
| H | 10.48618663 | -0.12778649 | 8.05991106 |
| H | 12.57747581 | -0.70037824 | 5.99077754 |
| H | 11.44571432 | 0.65562506  | 6.07972403 |
| O | 7.00590418  | -3.01522756 | 6.93889886 |
| C | 7.28085648  | -4.40823291 | 7.15567155 |
| C | 6.34693970  | -2.53165275 | 8.12895800 |
| C | 6.02489158  | -4.93543943 | 7.84744444 |
| H | 7.48814759  | -4.85791964 | 6.18448996 |
| H | 8.16792879  | -4.51082676 | 7.79933207 |
| C | 5.57814840  | -3.73554315 | 8.71759139 |
| H | 7.10809201  | -2.16794394 | 8.83182043 |
| H | 5.71427533  | -1.69578583 | 7.82805697 |
| H | 6.22351329  | -5.83698661 | 8.43512737 |
| H | 5.26254877  | -5.17358123 | 7.09844347 |
| H | 5.84658631  | -3.88238577 | 9.76844559 |
| H | 4.49673371  | -3.58388680 | 8.66706179 |
| O | 6.48953699  | -0.64646570 | 4.74431891 |

Function: B3LYP(GD3BJ)

Basis set: SDD for Rh, Au and 6-31G(d) for H, C, O, P

### 1-C<sub>6</sub>H<sub>6</sub>

|             |              |             |            |
|-------------|--------------|-------------|------------|
| Energy      | -2822.263483 |             |            |
| Enthalpy    | -2822.262538 |             |            |
| Free energy | -2822.420591 |             |            |
| Au          | 3.84558228   | 3.13108522  | 3.63728926 |
| Rh          | 4.16186330   | -0.43265003 | 4.63056233 |

|    |             |             |             |
|----|-------------|-------------|-------------|
| Rh | 6.44241545  | 0.52782204  | 3.18884223  |
| Rh | 6.07251642  | 1.23502609  | 5.91711040  |
| P  | 2.69393019  | 4.97608036  | 3.01237122  |
| O  | 4.87575235  | 1.49631211  | 4.20662930  |
| O  | 6.19162147  | -0.54978004 | 4.91595135  |
| C  | 2.16046015  | 0.11699201  | 5.05746836  |
| H  | 2.15177915  | 1.19994708  | 5.19951137  |
| C  | 2.21867316  | -0.35204203 | 3.72733727  |
| H  | 2.26918517  | 0.40156703  | 2.93984921  |
| C  | 1.73014413  | -1.72983812 | 3.28891724  |
| H  | 1.31364809  | -1.66253312 | 2.27657716  |
| H  | 0.90333407  | -2.05152915 | 3.93253828  |
| C  | 2.86547221  | -2.77983620 | 3.30283624  |
| H  | 2.44985917  | -3.79599027 | 3.40686424  |
| H  | 3.38043024  | -2.75525220 | 2.33509717  |
| C  | 3.91139828  | -2.51045718 | 4.37025232  |
| H  | 4.89607935  | -2.92008821 | 4.15110130  |
| C  | 3.64268926  | -2.18003016 | 5.71764243  |
| H  | 4.44759332  | -2.34125017 | 6.43327846  |
| C  | 2.23784616  | -2.10527215 | 6.31113144  |
| H  | 2.26664216  | -2.44293118 | 7.35394152  |
| H  | 1.57643211  | -2.80437420 | 5.78705340  |
| C  | 1.66175712  | -0.67191605 | 6.25591444  |
| H  | 0.55930804  | -0.69841405 | 6.28465146  |
| H  | 1.98180714  | -0.12900201 | 7.15360152  |
| C  | 7.02309450  | 2.16317116  | 1.97246014  |
| H  | 6.56013045  | 3.05488522  | 2.40168217  |
| C  | 6.19146843  | 1.31527310  | 1.20962409  |
| H  | 5.14442437  | 1.60645311  | 1.11470308  |
| C  | 6.70789648  | 0.35668703  | 0.14021401  |
| H  | 7.61606957  | 0.76642506  | -0.31670302 |
| H  | 5.97115845  | 0.28433602  | -0.66899605 |
| C  | 6.97945648  | -1.05589108 | 0.70836505  |
| H  | 6.05333242  | -1.64081012 | 0.65685004  |
| H  | 7.71678555  | -1.58757511 | 0.08401601  |
| C  | 7.41367256  | -1.03825608 | 2.16342916  |
| H  | 7.19843251  | -1.95479914 | 2.71050119  |
| C  | 8.38763863  | -0.17801401 | 2.71916920  |
| H  | 8.83444462  | -0.48736104 | 3.66301926  |
| C  | 9.19742767  | 0.82846206  | 1.90529414  |
| H  | 9.32754865  | 0.45817603  | 0.88211506  |
| H  | 10.20642374 | 0.90772107  | 2.32714217  |
| C  | 8.53871461  | 2.22681116  | 1.89399013  |

|   |             |             |             |
|---|-------------|-------------|-------------|
| H | 8.88295361  | 2.78552320  | 2.77278020  |
| H | 8.86839261  | 2.80061120  | 1.01138007  |
| C | 5.21846438  | 2.76514620  | 7.10853953  |
| H | 4.26535731  | 3.03310222  | 6.64633147  |
| C | 6.38792046  | 3.27208024  | 6.50100246  |
| H | 6.25484545  | 3.88293728  | 5.60685039  |
| C | 7.71417554  | 3.45847725  | 7.23304050  |
| H | 7.52646452  | 3.67164127  | 8.29158058  |
| H | 8.22780958  | 4.34211531  | 6.83513048  |
| C | 8.63587261  | 2.22512816  | 7.08620053  |
| H | 9.22465564  | 2.33307417  | 6.16724344  |
| H | 9.36046470  | 2.18447716  | 7.91658557  |
| C | 7.86684656  | 0.92044406  | 6.97200551  |
| H | 8.39470658  | 0.12526301  | 6.44598549  |
| C | 6.78313548  | 0.52744704  | 7.78973157  |
| H | 6.55801147  | -0.53757004 | 7.82131758  |
| C | 6.26053246  | 1.35269210  | 8.96312667  |
| H | 7.07949749  | 1.93386114  | 9.40198966  |
| H | 5.91356544  | 0.67774405  | 9.75445970  |
| C | 5.10045037  | 2.28545016  | 8.54519459  |
| H | 4.15761430  | 1.73026412  | 8.62191265  |
| H | 5.01887636  | 3.13513922  | 9.24407364  |
| C | 0.93631007  | 4.91101535  | 3.50041825  |
| C | 0.22184502  | 6.06185842  | 3.86104028  |
| H | 0.71978605  | 7.02654950  | 3.88533328  |
| C | -1.12855908 | 5.96598045  | 4.20526030  |
| H | -1.67671012 | 6.86020851  | 4.48879032  |
| C | -1.76935313 | 4.72391234  | 4.19252830  |
| H | -2.81837520 | 4.65124134  | 4.46580832  |
| C | -1.05680708 | 3.57284725  | 3.84194228  |
| H | -1.54614711 | 2.60309219  | 3.84539328  |
| C | 0.29298902  | 3.66313126  | 3.50134825  |
| H | 0.85156406  | 2.76478020  | 3.25233923  |
| C | 2.70481320  | 5.24820938  | 1.20761208  |
| C | 3.85408728  | 4.88296535  | 0.48853304  |
| H | 4.68998834  | 4.41524932  | 1.00189007  |
| C | 3.91638828  | 5.10232637  | -0.88772206 |
| H | 4.80721134  | 4.81295235  | -1.43782511 |
| C | 2.83039420  | 5.67706343  | -1.55553511 |
| H | 2.87694920  | 5.83971040  | -2.62875519 |
| C | 1.67987712  | 6.02980542  | -0.84471806 |
| H | 0.83030306  | 6.46594748  | -1.36287910 |
| C | 1.61456512  | 5.81633140  | 0.53427604  |



|   |             |             |            |
|---|-------------|-------------|------------|
| H | 0.71424305  | 6.08022542  | 1.08097608 |
| C | 3.36056224  | 6.50622449  | 3.75207427 |
| C | 3.89277328  | 6.43860945  | 5.04965936 |
| H | 3.93379328  | 5.48589137  | 5.57080739 |
| C | 4.38728432  | 7.58960653  | 5.66322343 |
| H | 4.80184334  | 7.52796055  | 6.66534650 |
| C | 4.36299731  | 8.81156062  | 4.98348136 |
| H | 4.75603634  | 9.70572872  | 5.45929037 |
| C | 3.84580228  | 8.87983464  | 3.68692726 |
| H | 3.83638028  | 9.82552270  | 3.15205423 |
| C | 3.34567324  | 7.73056654  | 3.06987822 |
| H | 2.95673021  | 7.78532855  | 2.05754815 |
| C | 8.84125164  | -3.55424826 | 4.73226934 |
| C | 7.57800352  | -3.33279724 | 5.29139338 |
| C | 6.90114852  | -4.39761032 | 5.89598342 |
| C | 7.47988655  | -5.66981243 | 5.94498841 |
| C | 8.74405861  | -5.88409344 | 5.38605537 |
| C | 9.42502067  | -4.82420335 | 4.77827334 |
| H | 9.36755165  | -2.73242820 | 4.25291331 |
| H | 7.12223454  | -2.34277817 | 5.24545038 |
| H | 5.91523341  | -4.23349230 | 6.32396944 |
| H | 6.94752148  | -6.49319646 | 6.41548144 |
| H | 9.19547268  | -6.87266047 | 5.42215340 |
| H | 10.40677972 | -4.98926136 | 4.34051931 |

**1(p-NMe<sub>2</sub>)-C<sub>6</sub>H<sub>6</sub>**

|             |              |             |            |
|-------------|--------------|-------------|------------|
| Energy      | -3223.991903 |             |            |
| Enthalpy    | -3223.990959 |             |            |
| Free energy | -3224.179982 |             |            |
| Au          | 3.81581232   | 3.14718053  | 3.60783521 |
| Rh          | 4.14712283   | -0.41711118 | 4.62101203 |
| Rh          | 6.42365474   | 0.54250629  | 3.17623017 |
| Rh          | 6.04770468   | 1.26672591  | 5.89569163 |
| P           | 2.66502247   | 5.00105028  | 2.99025164 |
| O           | 4.85428867   | 1.50643595  | 4.18437508 |
| O           | 6.17777216   | -0.52708031 | 4.91026372 |
| C           | 2.14478945   | 0.13527956  | 5.04066200 |
| H           | 2.13528149   | 1.21898619  | 5.17417260 |
| C           | 2.20567158   | -0.34291276 | 3.71403873 |
| H           | 2.25709046   | 0.40590915  | 2.92244571 |
| C           | 1.71795674   | -1.72372905 | 3.28436740 |
| H           | 1.30302033   | -1.66323860 | 2.27081679 |
| H           | 0.89008008   | -2.04152175 | 3.92884972 |

|   |             |             |             |
|---|-------------|-------------|-------------|
| C | 2.85323379  | -2.77366121 | 3.30722086  |
| H | 2.43731408  | -3.78934156 | 3.41698392  |
| H | 3.36980041  | -2.75511421 | 2.34012122  |
| C | 3.89765497  | -2.49657984 | 4.37437094  |
| H | 4.88235669  | -2.90870030 | 4.15969946  |
| C | 3.62653576  | -2.15713215 | 5.71925674  |
| H | 4.42976865  | -2.31449985 | 6.43771339  |
| C | 2.22047756  | -2.07871297 | 6.30972722  |
| H | 2.24746575  | -2.40915900 | 7.35507221  |
| H | 1.56003398  | -2.78175890 | 5.78941093  |
| C | 1.64396696  | -0.64590616 | 6.24319545  |
| H | 0.54119669  | -0.67276009 | 6.26969295  |
| H | 1.96161948  | -0.09665056 | 7.13794269  |
| C | 6.99641746  | 2.17793831  | 1.95621461  |
| H | 6.52879866  | 3.06769597  | 2.38359173  |
| C | 6.16842308  | 1.32489897  | 1.19541435  |
| H | 5.12070016  | 1.61252817  | 1.10037563  |
| C | 6.68898162  | 0.36637970  | 0.12799006  |
| H | 7.59527973  | 0.77898805  | -0.33051593 |
| H | 5.95196270  | 0.28885485  | -0.68069619 |
| C | 6.96742521  | -1.04381972 | 0.69893894  |
| H | 6.04369769  | -1.63278094 | 0.64905440  |
| H | 7.70688094  | -1.57357137 | 0.07503007  |
| C | 7.40152312  | -1.02115115 | 2.15416319  |
| H | 7.19109039  | -1.93818073 | 2.70242919  |
| C | 8.37209706  | -0.15536134 | 2.70780057  |
| H | 8.82150433  | -0.46113314 | 3.65163971  |
| C | 9.17702508  | 0.85288785  | 1.89115531  |
| H | 9.30833359  | 0.48099238  | 0.86855743  |
| H | 10.18608371 | 0.93769244  | 2.31220140  |
| C | 8.51166402  | 2.24809448  | 1.87704483  |
| H | 8.85364212  | 2.81037328  | 2.75451049  |
| H | 8.83850357  | 2.82171629  | 0.99297755  |
| C | 5.18084079  | 2.80228304  | 7.07087148  |
| H | 4.22641430  | 3.05790463  | 6.60517021  |
| C | 6.34621621  | 3.31224964  | 6.45823954  |
| H | 6.20734788  | 3.91325807  | 5.55869875  |
| C | 7.67064939  | 3.51697683  | 7.18857929  |
| H | 7.48137290  | 3.74071616  | 8.24488084  |
| H | 8.17747403  | 4.40007431  | 6.78041080  |
| C | 8.60216121  | 2.28926138  | 7.05602266  |
| H | 9.19057853  | 2.39208684  | 6.13617682  |
| H | 9.32667953  | 2.26355181  | 7.88739499  |

|   |             |             |             |
|---|-------------|-------------|-------------|
| C | 7.84338576  | 0.97731293  | 6.95468109  |
| H | 8.37863314  | 0.18095796  | 6.43786690  |
| C | 6.76240152  | 0.58434848  | 7.77636609  |
| H | 6.54600248  | -0.48207962 | 7.82005724  |
| C | 6.23354956  | 1.41823595  | 8.94091239  |
| H | 7.04799642  | 2.01082580  | 9.37326327  |
| H | 5.89198152  | 0.74935152  | 9.73993087  |
| C | 5.06635973  | 2.33731009  | 8.51258299  |
| H | 4.12779690  | 1.77566168  | 8.59523169  |
| H | 4.97781210  | 3.19405798  | 9.20233394  |
| C | 0.91251446  | 4.90824547  | 3.45278888  |
| C | 0.16762141  | 6.03767793  | 3.81846667  |
| H | 0.64848739  | 7.01095766  | 3.86329515  |
| C | -1.17929809 | 5.93687538  | 4.15137925  |
| H | -1.70901862 | 6.83600018  | 4.44123565  |
| C | -1.84475335 | 4.68633285  | 4.12785429  |
| C | -1.07801548 | 3.54568557  | 3.78119130  |
| H | -1.52498338 | 2.55940490  | 3.78201343  |
| C | 0.26576828  | 3.66179284  | 3.45240091  |
| H | 0.82712709  | 2.76284853  | 3.21055624  |
| C | 2.71501123  | 5.29036417  | 1.19929509  |
| C | 3.86286281  | 4.92726129  | 0.47628639  |
| H | 4.69181978  | 4.44315487  | 0.98632156  |
| C | 3.95585990  | 5.15169999  | -0.89058852 |
| H | 4.85631641  | 4.83857408  | -1.40411480 |
| C | 2.89168951  | 5.75845258  | -1.60379787 |
| C | 1.72683470  | 6.09817861  | -0.87258890 |
| H | 0.87128793  | 6.53446609  | -1.37330602 |
| C | 1.64879897  | 5.86855241  | 0.49731343  |
| H | 0.73388191  | 6.12908404  | 1.02215188  |
| C | 3.32522142  | 6.50079365  | 3.77200684  |
| C | 3.85899103  | 6.42117179  | 5.06863477  |
| H | 3.90314076  | 5.46146296  | 5.57698717  |
| C | 4.35948188  | 7.54389625  | 5.71352993  |
| H | 4.77530525  | 7.42488921  | 6.70623851  |
| C | 4.34664196  | 8.81325536  | 5.08281548  |
| C | 3.82998547  | 8.88136677  | 3.76555647  |
| H | 3.82591422  | 9.81960073  | 3.22450175  |
| C | 3.33075868  | 7.74752635  | 3.13225493  |
| H | 2.95709816  | 7.83532395  | 2.11583194  |
| C | 8.83502577  | -3.52077807 | 4.73882820  |
| C | 7.57217284  | -3.29704463 | 5.29796926  |
| C | 6.90071522  | -4.35705721 | 5.91689264  |

|   |             |             |             |
|---|-------------|-------------|-------------|
| C | 7.48433423  | -5.62641762 | 5.98030956  |
| C | 8.74821376  | -5.84286905 | 5.42143166  |
| C | 9.42376181  | -4.78788196 | 4.79916129  |
| H | 9.35681956  | -2.70282068 | 4.24806228  |
| H | 7.11239406  | -2.30908865 | 5.24151073  |
| H | 5.91496527  | -4.19109534 | 6.34456909  |
| H | 6.95594921  | -6.44602952 | 6.46189250  |
| H | 9.20346633  | -6.82927651 | 5.46868862  |
| H | 10.40520907 | -4.95459462 | 4.36117634  |
| N | 4.82472341  | 9.93877674  | 5.72771411  |
| N | -3.18808179 | 4.58052805  | 4.43588349  |
| N | 2.98641836  | 6.00421557  | -2.96072693 |
| C | 4.99252122  | 11.17358687 | 4.97960984  |
| H | 5.70827536  | 11.06785001 | 4.14859862  |
| H | 4.03582975  | 11.51501918 | 4.56716066  |
| H | 5.35850936  | 11.95073468 | 5.65275694  |
| C | 5.53843598  | 9.79189936  | 6.98652677  |
| H | 4.90091664  | 9.32475873  | 7.74585733  |
| H | 6.45227725  | 9.18577408  | 6.88307441  |
| H | 5.81964754  | 10.78063313 | 7.35310272  |
| C | -3.88765519 | 5.72919797  | 4.98696377  |
| H | -3.46073417 | 6.06036990  | 5.94717275  |
| H | -3.86209243 | 6.57517967  | 4.29002091  |
| H | -4.93417680 | 5.46502295  | 5.14815826  |
| C | -3.78155459 | 3.26339854  | 4.60421582  |
| H | -3.69205027 | 2.67316079  | 3.68499549  |
| H | -3.31696155 | 2.69531379  | 5.42552511  |
| H | -4.84480078 | 3.37780314  | 4.82203415  |
| C | 4.10635160  | 5.45709185  | -3.71018090 |
| H | 5.05913713  | 5.83578152  | -3.32269252 |
| H | 4.13461464  | 4.35644919  | -3.67962271 |
| H | 4.02428297  | 5.77134974  | -4.75206445 |
| C | 1.80604409  | 6.43002926  | -3.69418017 |
| H | 0.99504453  | 5.68532987  | -3.65402005 |
| H | 1.42090866  | 7.37833378  | -3.30110574 |
| H | 2.07502349  | 6.59022794  | -4.73963129 |

**1(p-NO<sub>2</sub>)-C<sub>6</sub>H<sub>6</sub>**

|             |              |             |            |
|-------------|--------------|-------------|------------|
| Energy      | -3435.774354 |             |            |
| Enthalpy    | -3435.773410 |             |            |
| Free energy | -3435.952772 |             |            |
| Au          | 3.84097877   | 3.11825767  | 3.59870377 |
| Rh          | 4.15425705   | -0.43073290 | 4.62097315 |

|    |             |             |             |
|----|-------------|-------------|-------------|
| Rh | 6.43844635  | 0.51447603  | 3.16629016  |
| Rh | 6.06203003  | 1.26256461  | 5.88632805  |
| P  | 2.69383128  | 4.96618371  | 3.00224954  |
| O  | 4.86376928  | 1.49722424  | 4.16602207  |
| O  | 6.18375451  | -0.53442907 | 4.91023981  |
| C  | 2.15015305  | 0.11369474  | 5.03942726  |
| H  | 2.13687524  | 1.19896165  | 5.16812329  |
| C  | 2.21152577  | -0.37335180 | 3.71560751  |
| H  | 2.26001354  | 0.36874812  | 2.91640886  |
| C  | 1.73038590  | -1.75958870 | 3.29616774  |
| H  | 1.31431298  | -1.70913316 | 2.28288805  |
| H  | 0.90492235  | -2.07582102 | 3.94371235  |
| C  | 2.87145889  | -2.80294055 | 3.32556623  |
| H  | 2.46148312  | -3.81942293 | 3.44357786  |
| H  | 3.38733946  | -2.78947283 | 2.35822665  |
| C  | 3.91446473  | -2.51447788 | 4.39064562  |
| H  | 4.90203308  | -2.92045305 | 4.17815840  |
| C  | 3.64325533  | -2.16620419 | 5.73249205  |
| H  | 4.44920761  | -2.31182191 | 6.45013985  |
| C  | 2.23789697  | -2.08968903 | 6.32422604  |
| H  | 2.26795283  | -2.41214757 | 7.37148961  |
| H  | 1.58046555  | -2.79936490 | 5.80995592  |
| C  | 1.65439612  | -0.66030691 | 6.24885686  |
| H  | 0.55247486  | -0.69227238 | 6.27710958  |
| H  | 1.97110419  | -0.10323433 | 7.13895352  |
| C  | 7.02200175  | 2.12923669  | 1.92516356  |
| H  | 6.55738249  | 3.02799013  | 2.33937836  |
| C  | 6.19361207  | 1.26804108  | 1.17330564  |
| H  | 5.14548060  | 1.55481645  | 1.07085162  |
| C  | 6.71415543  | 0.29210375  | 0.12175585  |
| H  | 7.62301285  | 0.69537749  | -0.33881808 |
| H  | 5.98062241  | 0.20520126  | -0.68861198 |
| C  | 6.98484583  | -1.11032705 | 0.71487894  |
| H  | 6.05975669  | -1.69722858 | 0.67044719  |
| H  | 7.72449323  | -1.65167635 | 0.10241273  |
| C  | 7.41570306  | -1.06823179 | 2.17024058  |
| H  | 7.19871525  | -1.97465656 | 2.73309849  |
| C  | 8.38633966  | -0.19789491 | 2.71468675  |
| H  | 8.82882481  | -0.49055873 | 3.66571661  |
| C  | 9.19751149  | 0.79630439  | 1.88744073  |
| H  | 9.33118225  | 0.40957241  | 0.87109135  |
| H  | 10.20473382 | 0.88349311  | 2.31122762  |
| C  | 8.53786835  | 2.19374224  | 1.85127293  |

|   |             |             |             |
|---|-------------|-------------|-------------|
| H | 8.87837575  | 2.76688744  | 2.72214181  |
| H | 8.87001550  | 2.75306467  | 0.96076701  |
| C | 5.20866095  | 2.80647852  | 7.05990767  |
| H | 4.25326280  | 3.06613665  | 6.59602661  |
| C | 6.37751900  | 3.30673395  | 6.44483659  |
| H | 6.24542403  | 3.90540775  | 5.54162390  |
| C | 7.70430564  | 3.50326979  | 7.17320859  |
| H | 7.51687403  | 3.73032124  | 8.22860002  |
| H | 8.21766605  | 4.38159746  | 6.76396286  |
| C | 8.62599816  | 2.26824279  | 7.04128836  |
| H | 9.21469483  | 2.36442344  | 6.12113426  |
| H | 9.35045166  | 2.23802016  | 7.87166271  |
| C | 7.85783695  | 0.96179501  | 6.94507573  |
| H | 8.38445949  | 0.16034130  | 6.42766130  |
| C | 6.77489958  | 0.57891444  | 7.76779728  |
| H | 6.54894740  | -0.48540452 | 7.81120649  |
| C | 6.25270487  | 1.41855156  | 8.93094475  |
| H | 7.07173833  | 2.00535124  | 9.36148871  |
| H | 5.90672286  | 0.75353481  | 9.73065434  |
| C | 5.09172300  | 2.34547948  | 8.50284803  |
| H | 4.14909593  | 1.79128236  | 8.58782601  |
| H | 5.01129416  | 3.20386028  | 9.19059875  |
| C | 0.93045997  | 4.89976414  | 3.48349633  |
| C | 0.21341823  | 6.04563946  | 3.85755127  |
| H | 0.70197556  | 7.01421935  | 3.88855450  |
| C | -1.13237558 | 5.94827629  | 4.20797850  |
| H | -1.70576616 | 6.81881563  | 4.50239385  |
| C | -1.73962863 | 4.69445294  | 4.17897390  |
| C | -1.04855109 | 3.53786614  | 3.82191892  |
| H | -1.55424082 | 2.57998776  | 3.82734381  |
| C | 0.29669843  | 3.64623663  | 3.47728157  |
| H | 0.85766701  | 2.75166683  | 3.22241216  |
| C | 2.70330767  | 5.28786195  | 1.20200991  |
| C | 3.85166604  | 4.92434518  | 0.47920976  |
| H | 4.68299054  | 4.43836309  | 0.98194309  |
| C | 3.92369465  | 5.16393430  | -0.89101477 |
| H | 4.79887148  | 4.88863659  | -1.46684591 |
| C | 2.83195163  | 5.75872262  | -1.52139472 |
| C | 1.67483337  | 6.11528141  | -0.83192514 |
| H | 0.84636770  | 6.56579847  | -1.36482632 |
| C | 1.61536813  | 5.87526163  | 0.54013320  |
| H | 0.71564356  | 6.13802994  | 1.08705826  |
| C | 3.35454117  | 6.48730984  | 3.77486212  |

|   |             |             |             |
|---|-------------|-------------|-------------|
| C | 3.90048477  | 6.38108084  | 5.06499649  |
| H | 3.94935986  | 5.41626578  | 5.56142725  |
| C | 4.40609686  | 7.50809386  | 5.70840220  |
| H | 4.83493533  | 7.44554654  | 6.70111401  |
| C | 4.36496389  | 8.73093216  | 5.04055396  |
| C | 3.84244278  | 8.86243217  | 3.75558952  |
| H | 3.84042726  | 9.83088946  | 3.27042372  |
| C | 3.33545760  | 7.72850762  | 3.12232724  |
| H | 2.93699480  | 7.81521029  | 2.11661844  |
| C | 8.83973682  | -3.54716802 | 4.76801598  |
| C | 7.57685738  | -3.32069866 | 5.32590241  |
| C | 6.89784105  | -4.38077588 | 5.93633372  |
| C | 7.47417964  | -5.65372941 | 5.99190855  |
| C | 8.73778617  | -5.87321102 | 5.43388960  |
| C | 9.42095474  | -4.81796886 | 4.82068397  |
| H | 9.36843389  | -2.72909187 | 4.28489715  |
| H | 7.12299914  | -2.33064601 | 5.27418559  |
| H | 5.91259181  | -4.21293842 | 6.36442081  |
| H | 6.94055248  | -6.47349884 | 6.46700981  |
| H | 9.18727080  | -6.86232357 | 5.47521416  |
| H | 10.40244370 | -4.98718848 | 4.38418537  |
| N | 4.90336861  | 9.93026069  | 5.71482869  |
| O | 5.36258577  | 9.78736934  | 6.84664469  |
| O | 4.85578161  | 10.99595504 | 5.10130391  |
| N | -3.16584402 | 4.58711057  | 4.54991222  |
| O | -3.75088529 | 5.62386783  | 4.86156401  |
| O | -3.67745479 | 3.46921655  | 4.52123707  |
| N | 2.89948343  | 6.01293556  | -2.97532449 |
| O | 3.92969406  | 5.68566880  | -3.56172388 |
| O | 1.92121354  | 6.53814874  | -3.50578973 |

## 7. References

1. (a) [Rh(OH)(cod)]<sub>2</sub>: Selent, D.; Ramm, M. *J. Organomet. Chem.* **1995**, *485*, 135. (b) AuCl(PPh<sub>3</sub>): Zalesskiy, S. S.; Sedykh, A. E.; Kashin, A. S.; Amanikov, V. P. *J. Am. Chem. Soc.* **2013**, *135*, 3550.
2. Frisch, M. J.; Trucks, G. W.; Schlegel, H. B.; Scuseria, G. E.; Robb, M. A.; Cheeseman, J. R.; Scalmani, G.; Barone, V.; Petersson, G. A.; Nakatsuji, H.; Li, X.; Caricato, M.; Marenich, A. V.; Bloino, J.; Janesko, B. G.; Gomperts, R.; Mennucci, B.; Hratchian, H. P.; Ortiz, J. V.; Izmaylov, A. F.; Sonnenberg, J. L.; Williams-Young, D.; Ding, F.; Lipparini, F.; Egidi, F.; Goings, J.; Peng, B.; Petrone, A.; Henderson, T.; Ranasinghe, D.; Zakrzewski, V. G.; Gao, J.; Rega, N.; Zheng, G.; Liang, W.; Hada, M.; Ehara, M.; Toyota, K.; Fukuda, R.; Hasegawa, J.; Ishida, M.; Nakajima, T.; Honda, Y.; Kitao, O.; Nakai, H.; Vreven, T.; Throssell, K.; Montgomery, J. A., Jr.; Peralta, J. E.; Ogliaro, F.; Bearpark, M. J.; Heyd, J. J.; Brothers, E. N.; Kudin, K. N.; Staroverov, V. N.; Keith, T. A.; Kobayashi, R.; Normand, J.; Raghavachari, K.; Rendell, A. P.; Burant, J. C.; Iyengar, S. S.; Tomasi, J.; Cossi, M.; Millam, J. M.; Klene, M.; Adamo, C.; Cammi, R.; Ochterski, J. W.; Martin, R. L.; Morokuma, K.; Farkas, O.; Foresman, J. B.; Fox, D. J. *Gaussian 16, Revision C.01*, Gaussian, Inc., Wallingford CT, **2019**.
3. (a) Lee, C.; Yang, W.; Parr, R. G. *Phys. Rev. B* **1988**, *37*, 785–789. (b) Becke, A. D. *J. Chem. Phys.* **1993**, *98*, 5648. (c) Perdew, J. P.; Chevary, J. A.; Vosko, S. H.; Jackson, K. A.; Pederson, M. R.; Singh, D. J.; Fiolhais, C. *Phys. Rev. B* **1992**, *46*, 6671.
4. Grimme, S.; Ehrlich, S.; Goerigk, L. *J. Comput. Chem.* **2011**, *32*, 1456.
5. Krishnan, R.; Binkley, J. S.; Seeger, R.; Pople, J. A. *J. Chem. Phys.* **1980**, *72*, 650.
6. Fuentealba, P.; Preuss, H.; Stoll, H.; Von Szentpály, L. *Chem. Phys. Lett.* **1982**, *89*, 418.
7. Marenich, A. V.; Cramer, C. J.; Truhlar, D. G. *J. Phys. Chem. B* **2009**, *113*, 6378.
8. Sheldrick, G.M. *Acta Cryst.* **2014**, *A70*, C1437.
9. Sheldrick, G.M. *Acta Cryst.* **2008**, *A64*, 112.
10. Crystal Structure Analysis Package, Rigaku Corporation (**2000-2016**). Tokyo 196-8666, Japan.
11. Macrae, C. F.; Edgington, P. R.; McCabe, P.; Pidcock, E.; Shields, G. P.; Taylor, R.; Towler, M.; van de Streek, J. *J. Appl. Crystallogr.* **2006**, *39*, 453.
